# Supplementary material for: Galantamine-loaded PLGA nanoparticles, from nano-emulsion templating, as novel advanced drug delivery systems to treat neurodegenerative diseases
Source: Royal Society of Chemistry journal article supplement (doi:10.1039/c5nr03474d), 2015-01-01
Supplement: c5nr03474d1.pdf [file c5nr03474d1.pdf]

# **Galantamine-loaded PLGA nanoparticles, from nano-emulsion templating, as novel advanced drug delivery systems to treat neurodegenerative diseases**

**Fornaguera C.<sup>a,b\*</sup>, Feiner-Gracia N.<sup>b,a</sup>, Calderó G.<sup>a,b</sup>, García-Celma M.J.<sup>c,b</sup>, Solans C.<sup>a,b</sup>**

<sup>a</sup>Institute of Advanced Chemistry of Catalonia (IQAC-CSIC).

<sup>b</sup>CIBER of Bioengineering, Biomaterials and Nanomedicine (CIBER-BBN), C/Jordi Girona, 18-26, 08034, Barcelona, Spain.

<sup>c</sup> Department of Pharmacy and Pharmaceutic Technology, University of Barcelona, Av/ Joan XXIII s/n, 08028, Barcelona, Spain

\*Corresponding author:

Adress: C/ Jordi Girona, 18-26, 08034, Barcelona, Spain

Telephone: +34-934006159

Fax: +34-932045904

E-mail address: cristina.fornaguera@iqac.csic.es (permanent: cfornaguera@gmail.com)

## **Supplementary information**

**Table S1:** Mass balance of the Rhodamine 6G fluorescent dye found in each fraction: the original nanoparticles (total encapsulated compound amount); non-filtered nanoparticles (encapsulated compound) and filtered dispersant (non-encapsulated compound).

| <b>Fraction measured</b>   | <b>mg of encapsulated fluorescent dye</b> | <b>Percentage of encapsulated dye</b> |
|----------------------------|-------------------------------------------|---------------------------------------|
| Original NP                | 340,57                                    | 100%                                  |
| Filtered fraction (no NP)  | 0                                         | 0%                                    |
| Non-filtered fraction (NP) | 320,13                                    | 93,99%                                |

As Table S1 shows, 320 mg of the initial 340 mg encapsulated compound, were recovered in the non-filtrated fraction, which represent almost 94% of encapsulated compound. Therefore, using this methodology, most of the encapsulated compound is found after the experimental procedure, thus confirming that this methodology can be useful for the encapsulation efficiency determination.

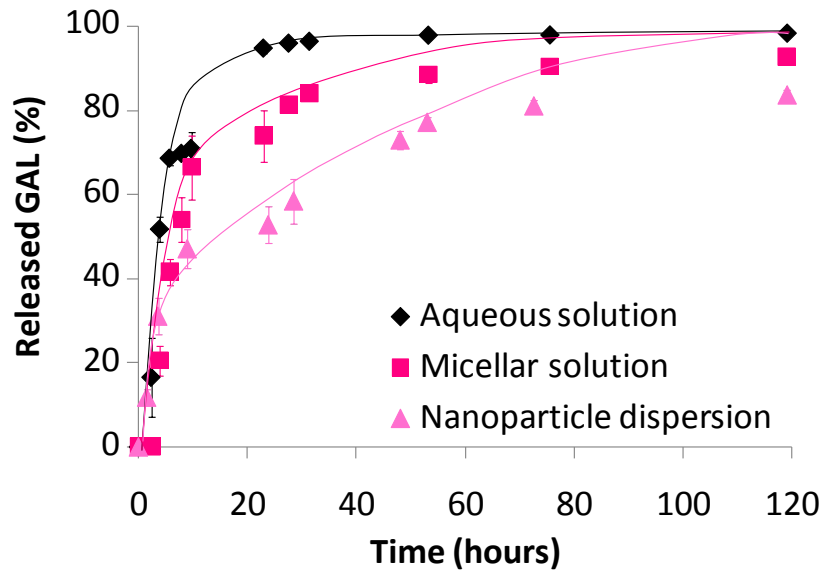

**Figure S2:** GAL release from a) an aqueous solution; b) a micellar solution with 3 wt. % surfactant and c) a nanoparticle dispersion. Symbols represent experimental results and solid lines the fittings of the experimental points to the theoretical Fick's law of diffusion.

**Table S3:** Solubility (in  $\mu\text{g/mL}$ ) of galantamine and dexamethasone drugs in an aqueous solution.

| <b>Drug</b>          | <b>Solubility in water</b>  |
|----------------------|-----------------------------|
| <b>Galantamine</b>   | $\approx 60 \mu\text{g/mL}$ |
| <b>Dexamethasone</b> | $\approx 9 \mu\text{g/mL}$  |
